# Supplementary material for: Genetic profiling of synchronous pituitary corticotroph adenomas
Source: Pituitary. 2025 Jun 22;28(4):77. doi: 10.1007/s11102-025-01549-6 (PMC12183135; doi:10.1007/s11102-025-01549-6)
Supplement: Supplementary file 2 — Supplementary Material 2 [file 11102_2025_1549_MOESM2_ESM.xlsx]

## Sheet: Summary
Supplementary Table-1. Sequencing statstics
Sample	Reads (M)
Tumor-Left	88.0047
Tumor-Right	101.828
Blood	69.4979
Total Reads (M)	259.33

## Sheet: Stats
flowcell-id	name2	name3	number	BarcodeCount	PerfectBarcodeCount	OneMismatchBarcodeCount
H32VGDRXY	Tumor-Left	GTGACAGT+TGACAGTG	1	43267690	42024648	1243042
H32VGDRXY	Tumor-Left	GTGACAGT+TGACAGTG	2	44736981	43495473	1241508
H32VGDRXY	Tumor-Left	all	1	43267690	42024648	1243042
H32VGDRXY	Tumor-Left	all	2	44736981	43495473	1241508
H32VGDRXY	Tumor-Right	ACAGTGAC+CAGTGACA	1	49998904	48722476	1276428
H32VGDRXY	Tumor-Right	ACAGTGAC+CAGTGACA	2	51828813	50550408	1278405
H32VGDRXY	Tumor-Right	all	1	49998904	48722476	1276428
H32VGDRXY	Tumor-Right	all	2	51828813	50550408	1278405
H32VGDRXY	Blood	GTACAGCT+TCGACATG	1	34399887	33625298	774589
H32VGDRXY	Blood	GTACAGCT+TCGACATG	2	35097998	34329409	768589
H32VGDRXY	Blood	all	1	34399887	33625298	774589
H32VGDRXY	Blood	all	2	35097998	34329409	768589
